# Supplementary material for: Multiple Wnts act synergistically to induce Chk1/Grapes expression and mediate G2 arrest in Drosophila tracheoblasts
Source: eLife. 2020 Sep 2;9:e57056. doi: 10.7554/eLife.57056 (PMC7505655; doi:10.7554/eLife.57056)
Supplement: Figure 1—source data 1. — Figure 1C Numerical data for number of cells in Tr2 DT of wild type and Btl-ArmRNAi larvae at 24–26 h L3. [file elife-57056-fig1-data1.xlsx]

## Sheet: Figure 1B
Control		Chk1 RNAi		TCF RNAi		Dsh RNAi		Fz2 RNAi
L2	16-24 h L3	L2	16-24 h L3	L2	16-24 h L3	L2	16-24 h L3	L2	16-24 h L3
20	20	20	41	20	43	16	27	15	31
17	18	19	48	20	40	17	29	17	28
20	20	23	39	22	42	17	31	18	30
20	18	22	37	23	44	16	28	16	33
18	18	21	43	23	38	16	32	16	26
18	19	21	45	19	41	18	27	19	28
20	18	23	43	22	39	16	27	18	36
18	20		37		40		28	17	33
	17				39
	18				38
	21
18.875	18.8182	21.2857	41.625	21.2857	40.4	16.5714	28.625	17	30.625
1.24642	1.25045	1.49603	3.88909	1.60357	2.06559	0.786796	1.92261	1.30931	3.29231
			1.20689e-12		2.82793e-17		1.61583e-10
		0.00468189

## Sheet: Figure 1C
Control	Arm RNAi
24-26 h L3	24-26 h L3
22	34
23	36
20	37
21	32
22	31
21	34
22	33
21.5714	33.8571
0.9759	2.1157
	8.95883e-06
