# Supplementary material for: Multiple Wnts act synergistically to induce Chk1/Grapes expression and mediate G2 arrest in Drosophila tracheoblasts
Source: eLife. 2020 Sep 2;9:e57056. doi: 10.7554/eLife.57056 (PMC7505655; doi:10.7554/eLife.57056)
Supplement: Figure 3—source data 1. [file elife-57056-fig3-data1.xlsx]

## Sheet: Figure 3C
16-24h L3
Control	TCF RNAi	TCF RNAi UAS Chk1	TCF RNAi UAS ATR
16	32	16	28
17	35	16	33
18	35	16	31
17	33	17	29
16	33	16	34
16	32	17	30
17	31	18	30
18	27	17	33
	28	17	30
16.875	31.7778	16.6667	30.8889
0.834523	2.77389	0.707107	2.02759
	2.91434e-10	3.37724e-11	0.449003
		0.585481
