# Supplementary material for: Multiple Wnts act synergistically to induce Chk1/Grapes expression and mediate G2 arrest in Drosophila tracheoblasts
Source: eLife. 2020 Sep 2;9:e57056. doi: 10.7554/eLife.57056 (PMC7505655; doi:10.7554/eLife.57056)
Supplement: Figure 4—source data 1. — Figure 4E Numerical data for number of cells in Tr2 DT of wild type, Wgts, Wnt5[400] and Wnt6[KO] larvae at different stages. [file elife-57056-fig4-data1.xlsx]

## Sheet: Figure 4C
Wg RNAi		Wnt5 RNAi		Wnt6 RNAi		Wnt10 RNAi
L2	16-24 h L3	L2	16-24 h L3	L2	16-24 h L3	L2	16-24 h L3
16	31	17	25	23	40	17	24
18	37	18	29	20	45	17	26
18	32	17	32	21	40	17	31
17	25	17	35	21	39	18	20
16	35	18	31	22	39	17	25
18	32	18	25	20	42	18	30
20	27	20	26	23	39	18	25
	30	18	29		40		23
17.5714	31.125	17.875	29	21.4286	40.5	17.4286	25.5
1.39728	3.90741	0.991031	3.58569	1.27242	2.0702	0.534522	3.58569
	1.88578e-08		9.89052e-08		8.70171e-16		2.26996e-05

## Sheet: Figure 4E
Control	Wgts		FRT19A	Wnt5 500		Control		Wnt6 KO
24-26 h L3	24-26 h L3		16-24 h L3	16-24 h L3		L2	16-24 h L3	L2	16-24 h L3
22	38		18	25		20	20	18	35
23	32		19	23		17	18	20	38
20	35		17	24		20	20	17	32
21	39		17	22		20	18	17	29
22	33		18	23		18	18	15	34
21	36		16	22		18	19	18	40
22	38		17	25		20	18	27	36
	37		17	23		18	20	16	39
	36			25			17	16	42
	35						18		40
							21		39
21.5714	35.9		17.375	23.5556		18.875	18.8182	18.2222	36.7273
0.9759	2.23358		0.916125	1.23603		1.24642	1.25045	3.59784	3.9266
				7.02335e-09
